# Supplementary material for: Effect of fatty acid on the formation of ITO nanocrystals via one-pot pyrolysis reaction
Source: Royal Society of Chemistry journal article supplement (doi:10.1039/c4ce02082k), 2014-12-03
Supplement: c4ce02082k1.pdf [file c4ce02082k1.pdf]

# Effect of fatty acid on the formation of ITO nanocrystals *via* one-pot reaction

Shaojuan Luo, Jiyun Feng, Ka Ming Ng\*

Department of Chemical and Biomolecular Engineering  
The Hong Kong University of Science and Technology  
Clear Water Bay, Hong Kong

A manuscript submitted to *CrystEngComm*

Original Submission: 15 Oct 2014

\*Corresponding author

Tel: +852 23587238; E-mail: [kekmng@ust.hk](mailto:kekmng@ust.hk)

Supporting information:

| Sample Parameter  | Spectrum Parameter           | <br>Time-of-Flight<br>Mass Spectrometers |
|-------------------|------------------------------|----------------------------------------------------------------------------------------------------------------------------|
| Sample: ITO - C10 | Polarity: positive           |                                                                                                                            |
| Origin:           | Area / $\mu\text{m}^2$ : 200 |                                                                                                                            |
| File: LU3_101.dat | Time / s: 40                 |                                                                                                                            |
| Comments:;;       |                              | PI dose: 7.49E+007                                                                                                         |

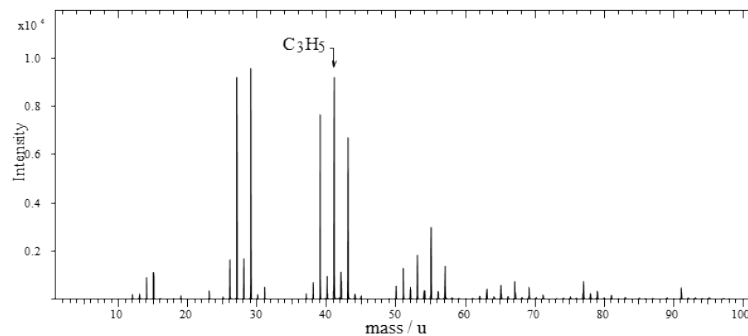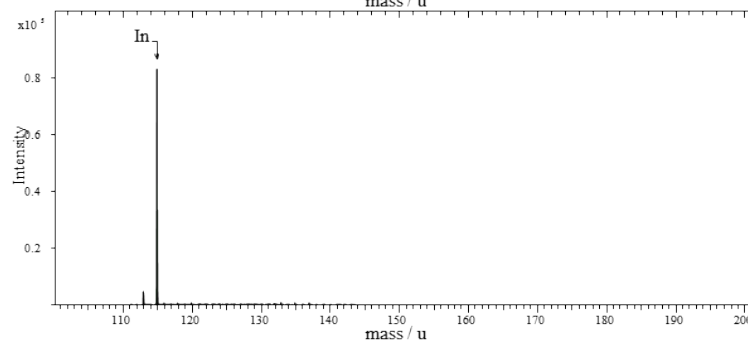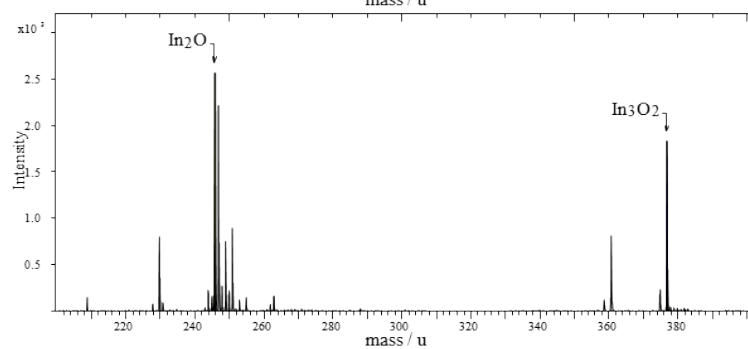

| Sample Parameter  | Spectrum Parameter           | <br>Time-of-Flight<br>Mass Spectrometers |
|-------------------|------------------------------|-----------------------------------------------------------------------------------------------------------------------------|
| Sample: ITO - C10 | Polarity: negative           |                                                                                                                             |
| Origin:           | Area / $\mu\text{m}^2$ : 200 |                                                                                                                             |
| File: LU3_102.dat | Time / s: 40                 |                                                                                                                             |
| Comments:;;       |                              | PI dose: 7.49E+007                                                                                                          |

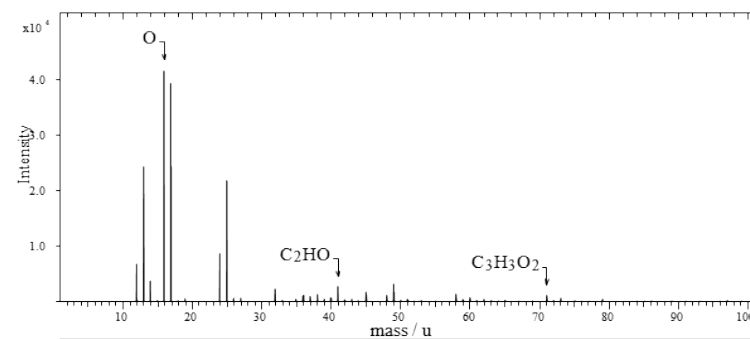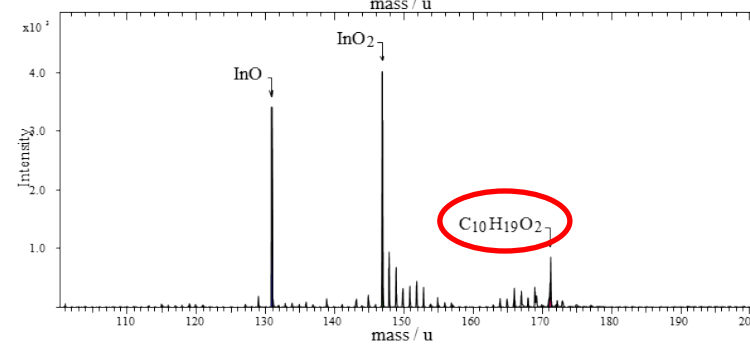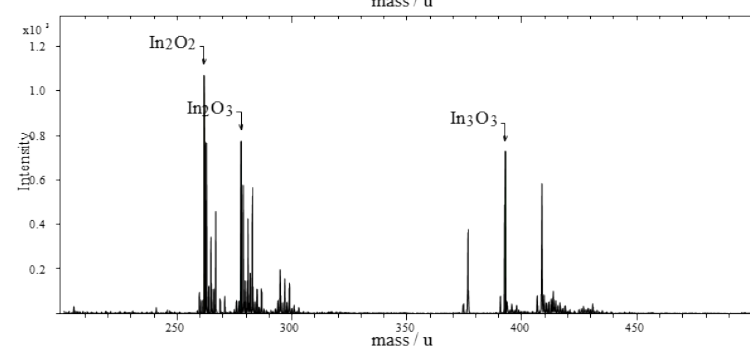

(a) C10-ITO

| Sample Parameter |             | Spectrum Parameter           |
|------------------|-------------|------------------------------|
| Sample:          | ITO - C12   | Polarity: positive           |
| Origin:          |             | Area / $\mu\text{m}^2$ : 200 |
|                  |             | Time / s: 40                 |
| File:            | LU3_204.dat | PI dose: 7.49E+007           |
| Comments:;;      |             |                              |

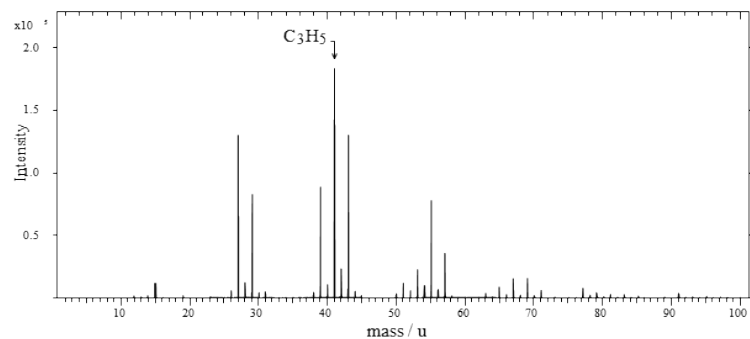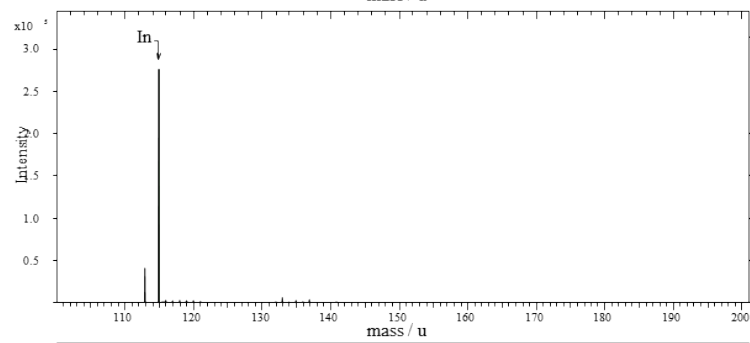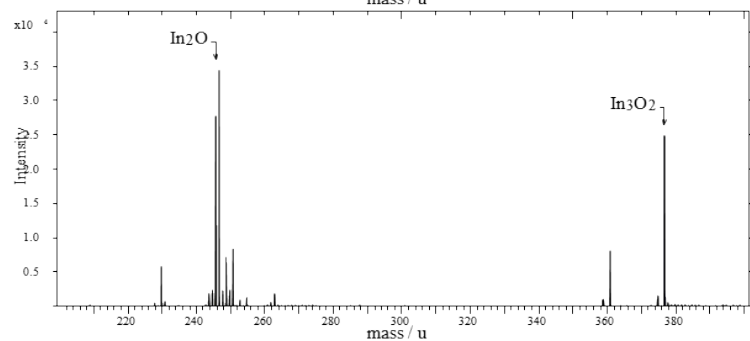

| Sample Parameter |             | Spectrum Parameter           |
|------------------|-------------|------------------------------|
| Sample:          | ITO - C12   | Polarity: negative           |
| Origin:          |             | Area / $\mu\text{m}^2$ : 200 |
|                  |             | Time / s: 50                 |
| File:            | LU3_203.dat | PI dose: 9.36E+007           |
| Comments:;;      |             |                              |

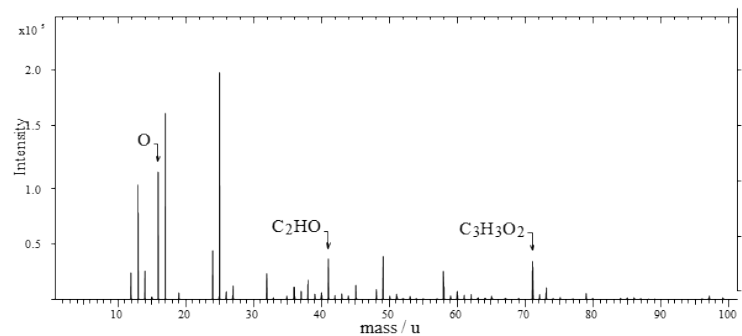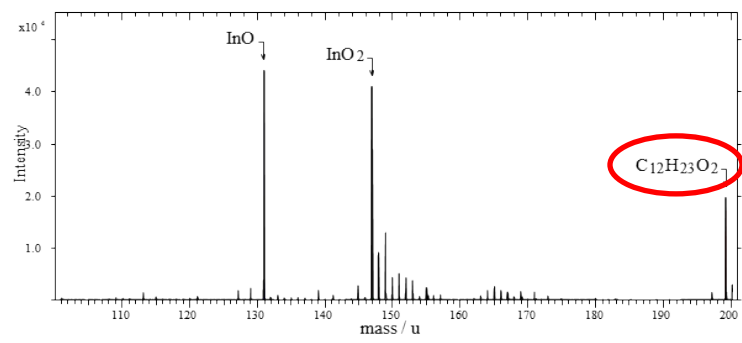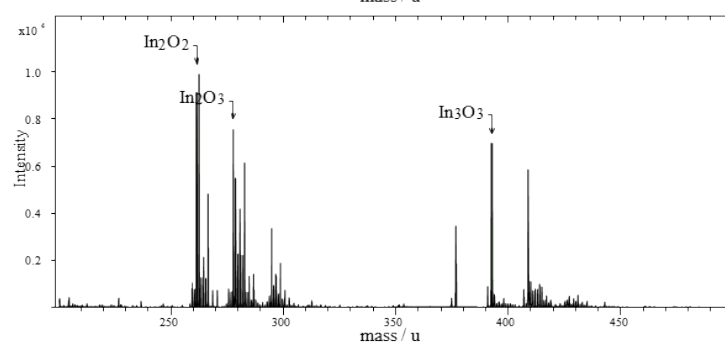

(b) C12-ITO

| Sample Parameter  | Spectrum Parameter           | <br>Time-of-Flight<br>Mass Spectrometers |
|-------------------|------------------------------|---------------------------------------------------------------------------------------------------------------------------|
| Sample: ITO - C14 | Polarity: positive           |                                                                                                                           |
| Origin:           | Area / $\mu\text{m}^2$ : 200 |                                                                                                                           |
| File: LU3_300.dat | Time / s: 40                 |                                                                                                                           |
| Comments: ; ;     | PI dose: 7.49E+007           |                                                                                                                           |

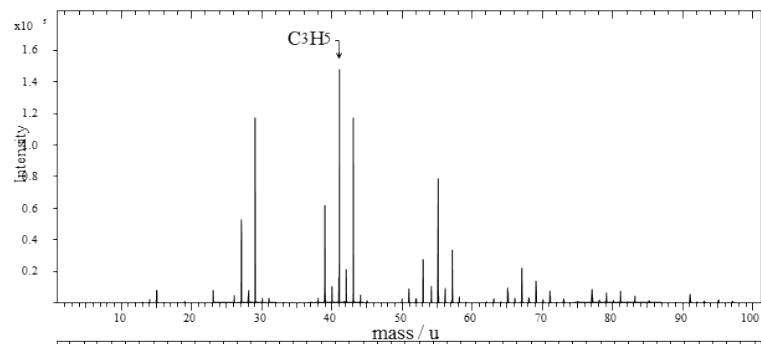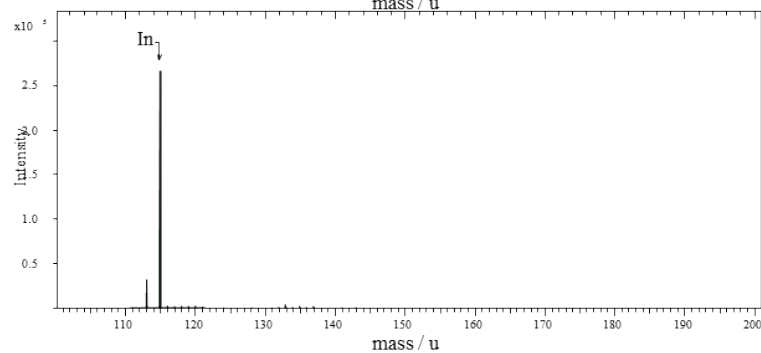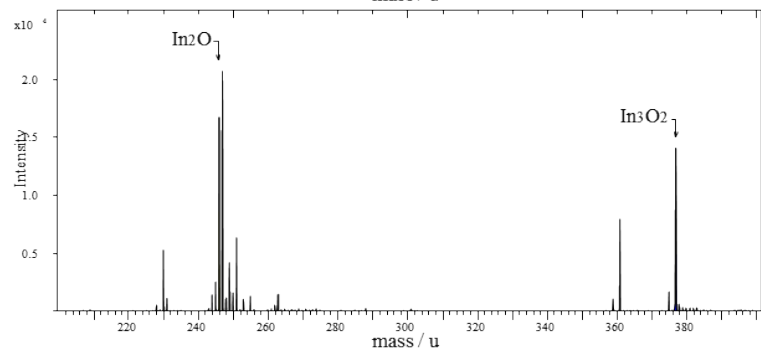

| Sample Parameter  | Spectrum Parameter           | <br>Time-of-Flight<br>Mass Spectrometers |
|-------------------|------------------------------|-----------------------------------------------------------------------------------------------------------------------------|
| Sample: ITO - C14 | Polarity: negative           |                                                                                                                             |
| Origin:           | Area / $\mu\text{m}^2$ : 200 |                                                                                                                             |
| File: LU3_304.dat | Time / s: 40                 |                                                                                                                             |
| Comments: ; ;     | PI dose: 7.49E+007           |                                                                                                                             |

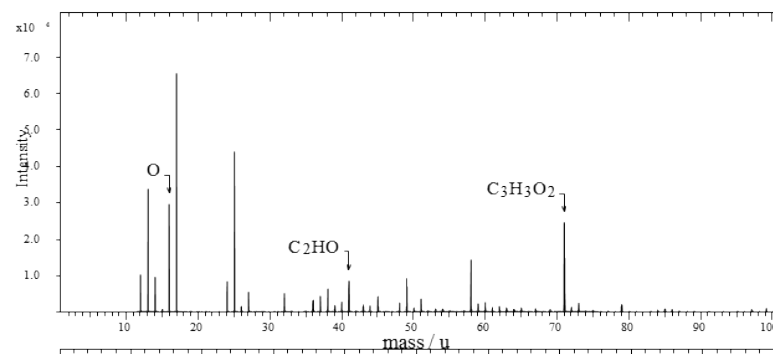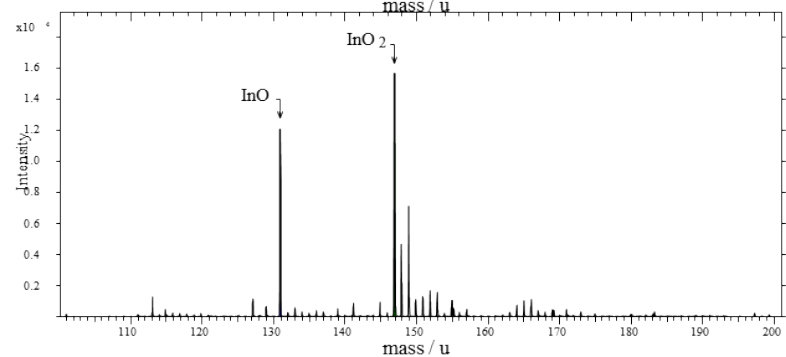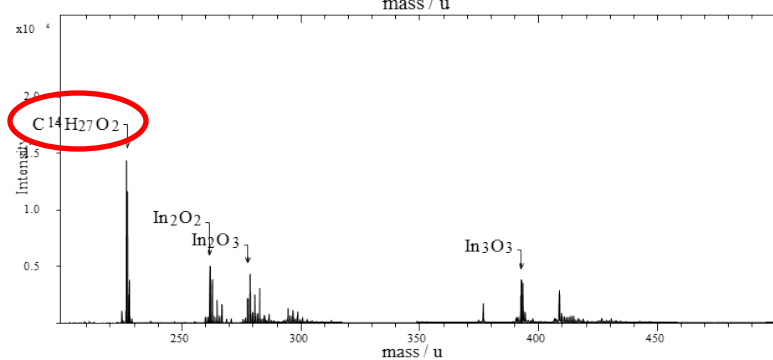

(c) C14-ITO

| Sample Parameter |             | Spectrum Parameter           |
|------------------|-------------|------------------------------|
| Sample:          | ITO - C16   | Polarity: positive           |
| Origin:          |             | Area / $\mu\text{m}^2$ : 200 |
|                  |             | Time / s: 40                 |
| File:            | LU3_402.dat | PI dose: 7.49E+007           |
| Comments:;;      |             |                              |

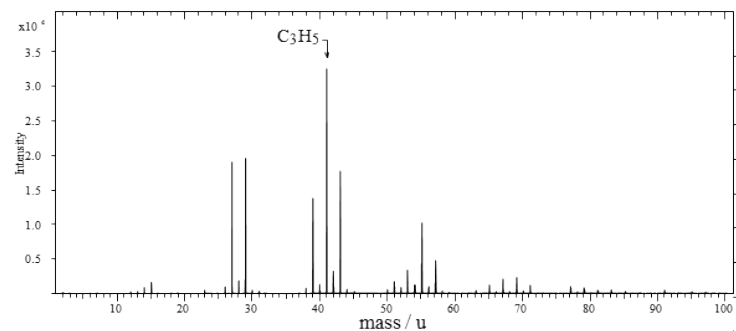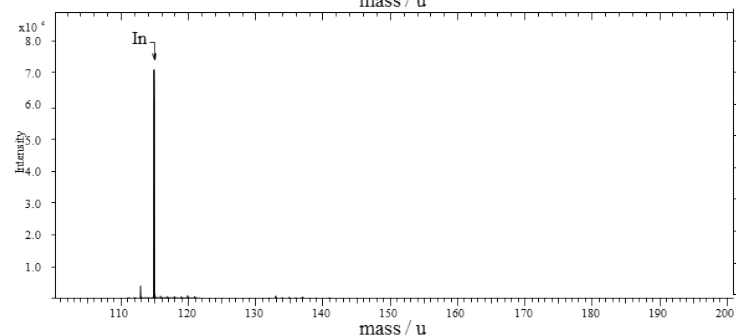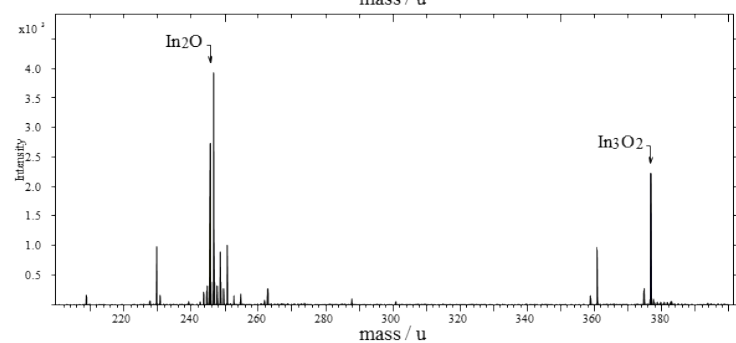

| Sample Parameter |             | Spectrum Parameter           |
|------------------|-------------|------------------------------|
| Sample:          | ITO - C16   | Polarity: negative           |
| Origin:          |             | Area / $\mu\text{m}^2$ : 200 |
|                  |             | Time / s: 40                 |
| File:            | LU3_401.dat | PI dose: 7.49E+007           |
| Comments:;;      |             |                              |

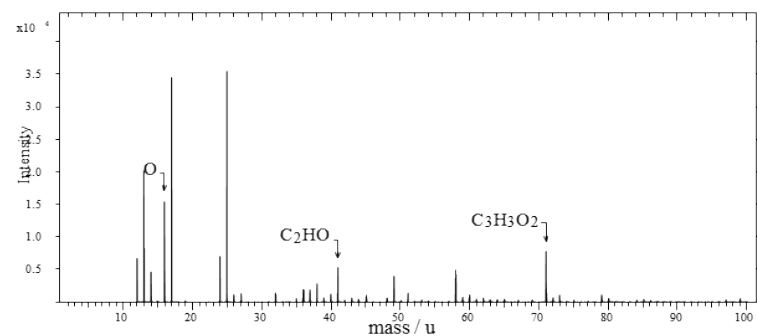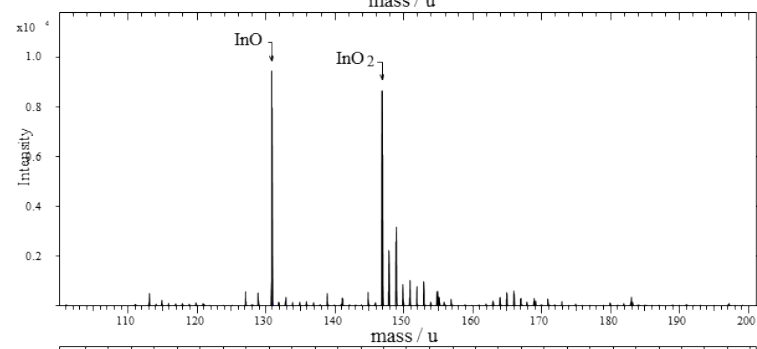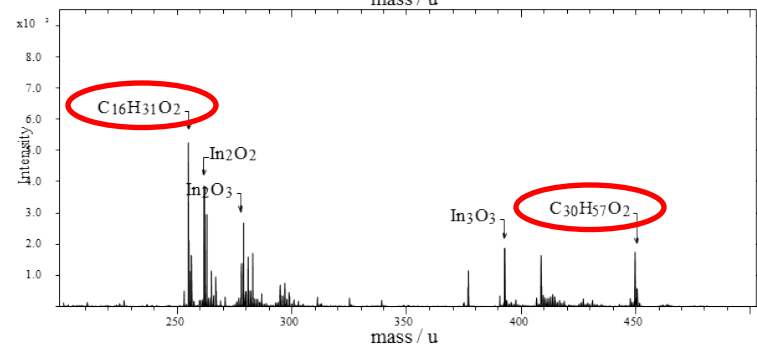

(d) C16-ITO

| Sample Parameter          | Spectrum Parameter           | <br>Time-of-Flight<br>Mass Spectrometers |
|---------------------------|------------------------------|---------------------------------------------------------------------------------------------------------------------------|
| Sample: ITO nanoparticles | Polarity: positive           |                                                                                                                           |
| Origin:                   | Area / $\mu\text{m}^2$ : 200 |                                                                                                                           |
| File: LU2_108.dat         | Time / s: 40                 |                                                                                                                           |
| Comments: Bi3+;           |                              | PI dose: 7.49E+007                                                                                                        |

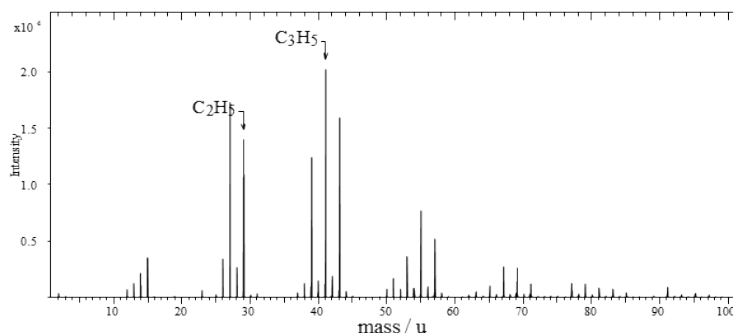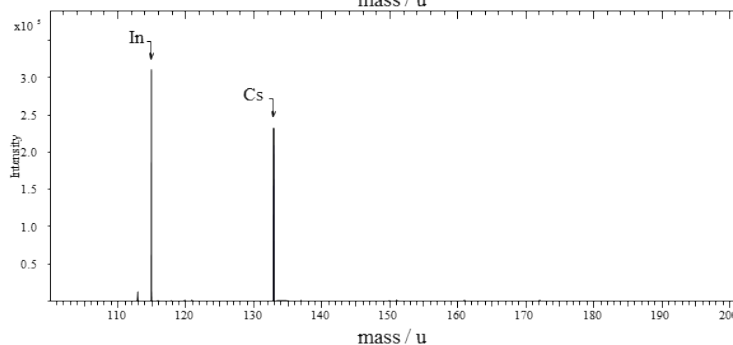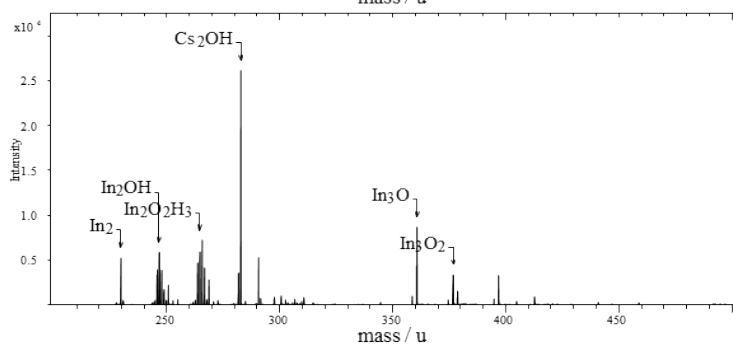

| Sample Parameter          | Spectrum Parameter           | <br>Time-of-Flight<br>Mass Spectrometers |
|---------------------------|------------------------------|-----------------------------------------------------------------------------------------------------------------------------|
| Sample: ITO nanoparticles | Polarity: negative           |                                                                                                                             |
| Origin:                   | Area / $\mu\text{m}^2$ : 200 |                                                                                                                             |
| File: LU2_107.dat         | Time / s: 40                 |                                                                                                                             |
| Comments: Bi3+;           |                              | PI dose: 7.49E+007                                                                                                          |

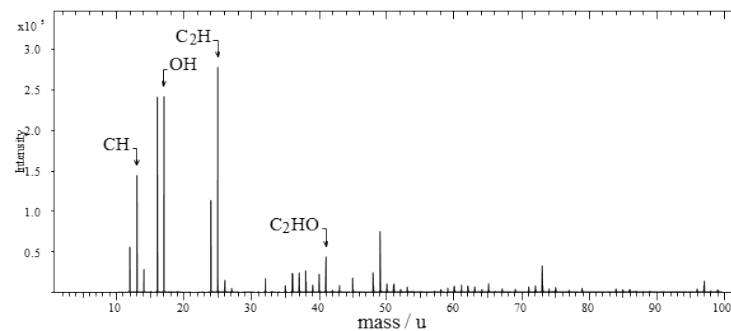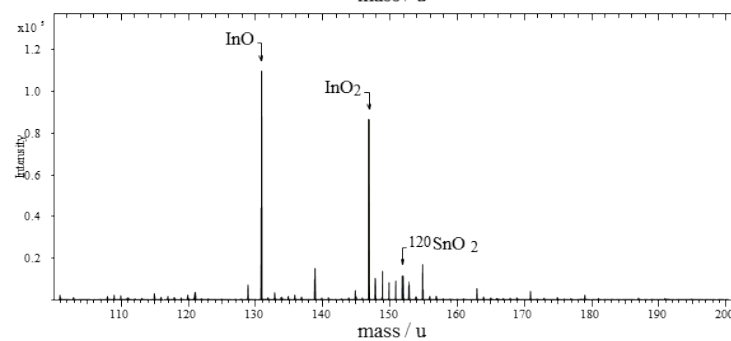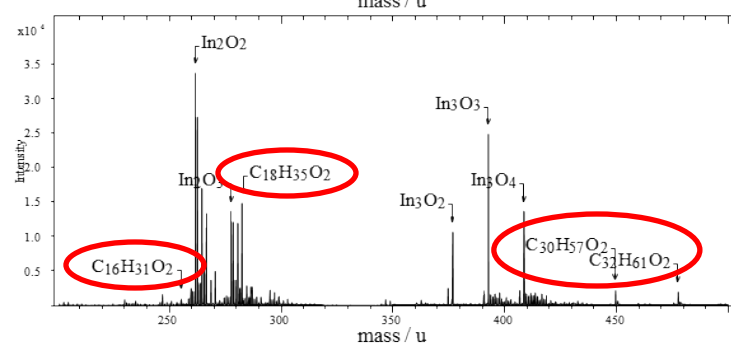

(e) C18-ITO

Figure S1 TOF-SIMS spectra of the surfaces of the C10-ITO, C12-ITO, C14-ITO, C16-ITO and C18-ITO nanocrystals.
